# Supplementary material for: Polybenzoxazine-based highly porous carbon nanofibrous membranes hybridized by tin oxide nanoclusters: durable mechanical elasticity and capacitive performance
Source: Royal Society of Chemistry journal article supplement (doi:10.1039/c6ta00762g), 2016-01-01
Supplement: c6ta00762g1.pdf [file c6ta00762g1.pdf]

## Supplementary Information

### **Polybenzoxazine-based highly porous carbon nanofibrous membranes hybridized by tin oxides nanoclusters: durable mechanical elasticity and capacitive performance**

Jianlong Ge<sup>a</sup>, Yongshuai Qu<sup>a</sup>, Leitao Cao<sup>a</sup>, Fei Wang<sup>a</sup>, Lvyue Dou<sup>a</sup>, Jianyong Yu<sup>a</sup>, Bin Ding<sup>a,b,\*</sup>

<sup>a</sup> Key Laboratory of Textile Science & Technology, Ministry of Education, College of Textiles, Donghua University, Shanghai 201620, China.

<sup>b</sup> Nanofibers Research Centre, Modern Textile Institute, Donghua University, Shanghai 20051, China

\*Email: binding@dhu.edu.cn

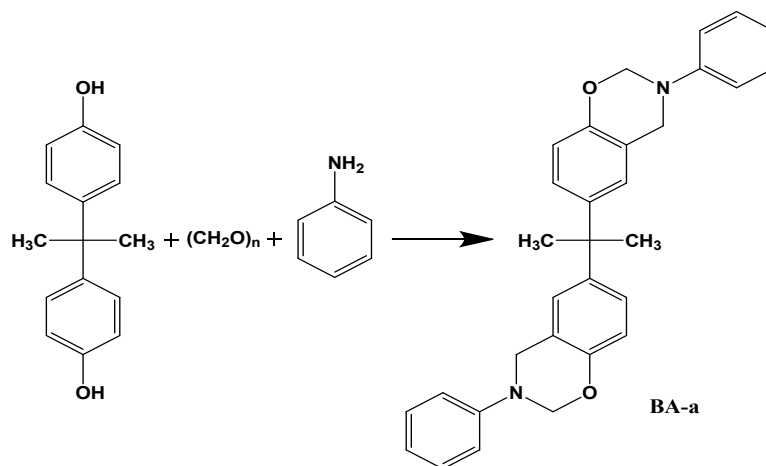

Fig. S1 Chemical synthetic route of BA-a.

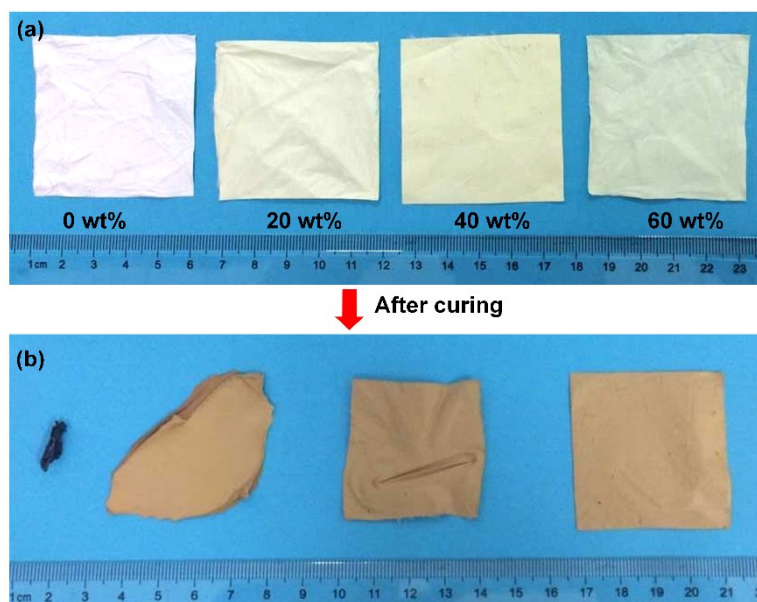

Fig. S2 Digital photo of the precursor membranes with different  $\text{SnCl}_2$  weight ratio to BA-a monomer before (a) and after (b) curing.

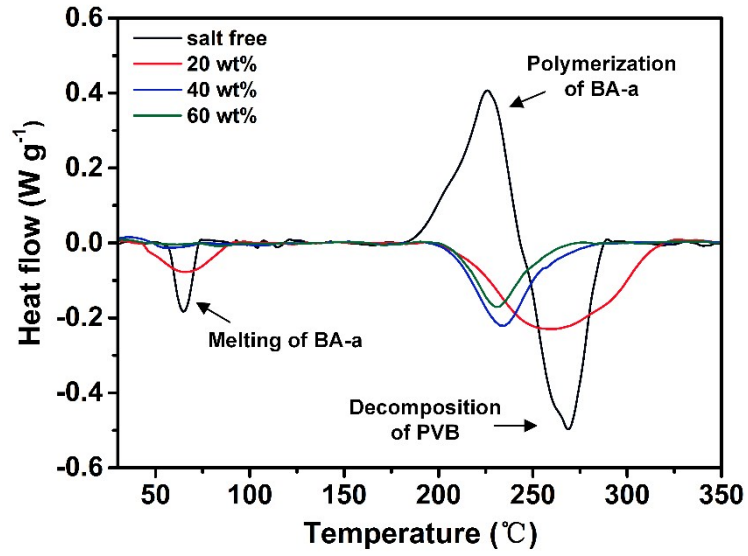

Fig. S3 The DSC curves of as-spun nanofibrous membranes with different weight ratio of  $\text{SnCl}_2$  to BA-a.

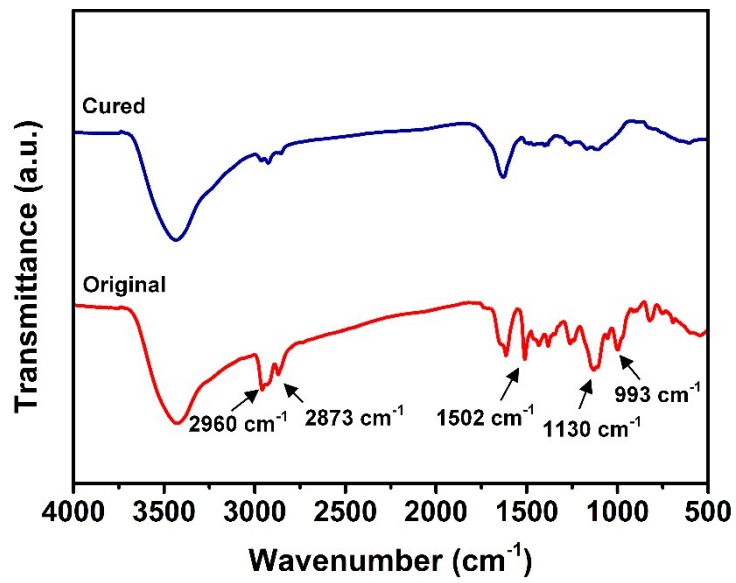

Fig. S4 FT-IR spectra of relevant original and cured precursor nanofibrous membranes.

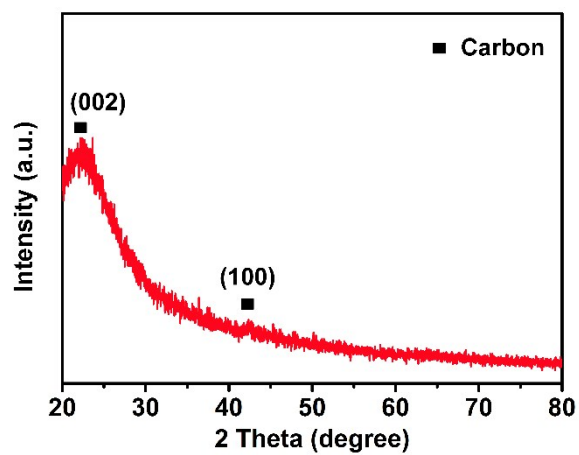

Fig. S5 XRD spectra of pure carbon membranes derived from precursor nanofibers without  $\text{SnCl}_2$ .

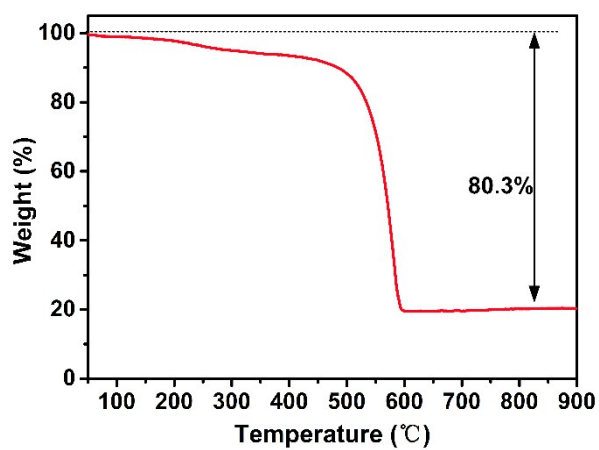

Fig. S6 TGA plots of  $\text{SnO}_2/\text{CNFs}$  derived from precursor nanofibers with different 60%  $\text{SnCl}_2$  aspect to BA-a.

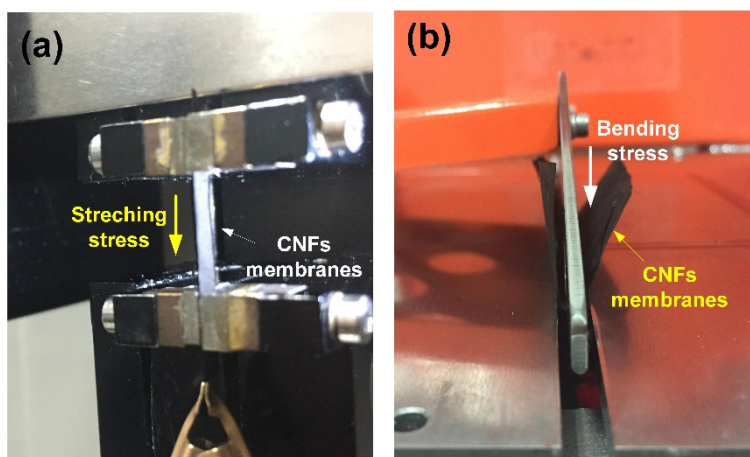

Fig. S7 Digital photos demonstrate the (a) tensile strength and (b) bending rigidity testing process.

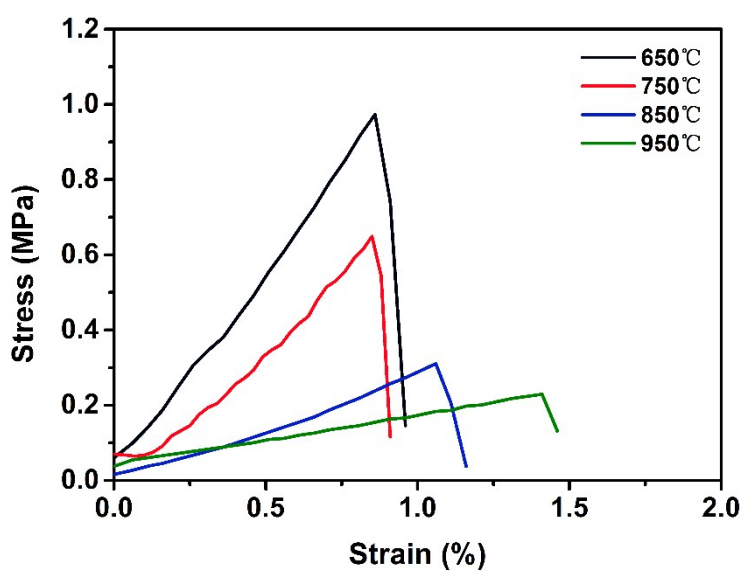

Fig. S8 Stress-strain curves of the SnO<sub>2</sub>/CNFs membranes derived from different carbonization temperatures.

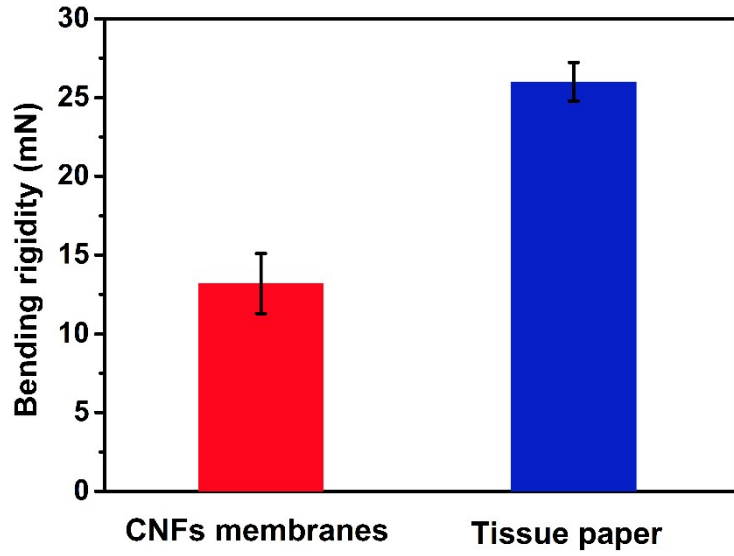

Fig. S9 Compare of the bending rigidity of the as-prepared SnO<sub>2</sub>/CNFs membranes and commercial polymer based tissue paper.

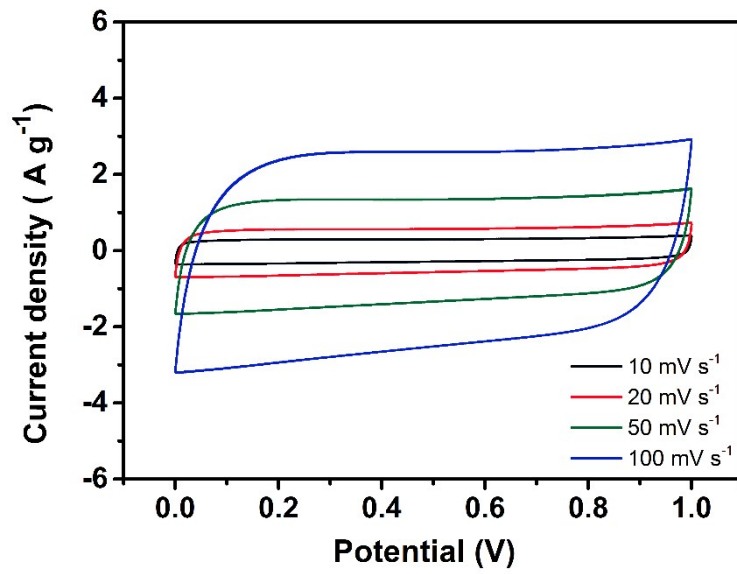

Fig. S10 CV curves of CNFs derived from composite SnO<sub>2</sub>/CNFs via etching the SnO<sub>2</sub> component.

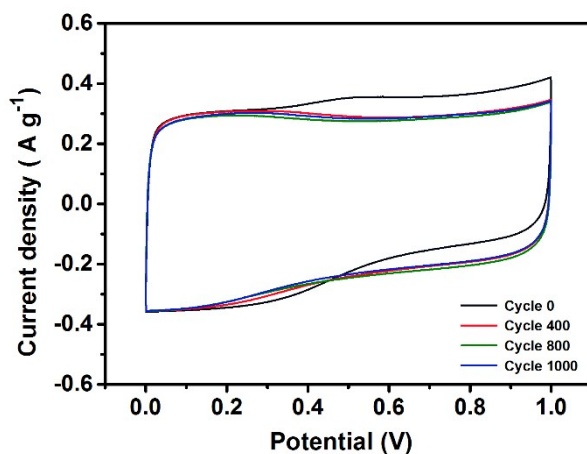

Fig. S11 CV curves of supercapacitors derived from SnO<sub>2</sub>/CNFs electrodes suffering from various cycles of bending deformation.

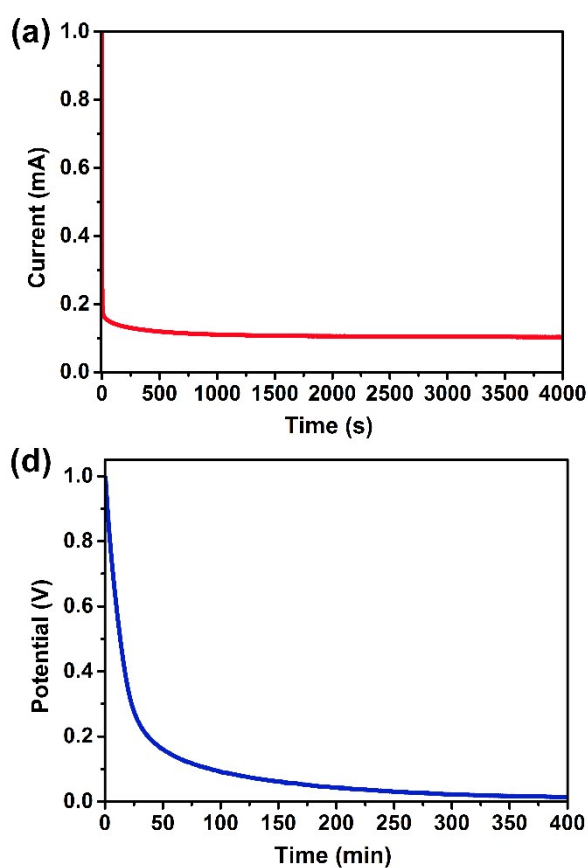

Fig. S12 (a) Leakage current curves of the SnO<sub>2</sub>/CNFs based supercapacitor. (b) Self-discharge curve of the device.

Table S1. Composition and property of different electrospinning solutions.

| Weight ratio of SnCl <sub>2</sub><br>aspect to BA-a | Viscosity<br>(cps) | Conductivity<br>( $\mu\text{S m}^{-1}$ ) | Surface tension<br>( $\text{mN m}^{-1}$ ) |
|-----------------------------------------------------|--------------------|------------------------------------------|-------------------------------------------|
| 0                                                   | 44                 | 310                                      | 35                                        |
| 20                                                  | 54                 | 494                                      | 30                                        |
| 40                                                  | 209                | 851                                      | 27                                        |
| 60                                                  | 215                | 1308                                     | 31                                        |
